# Supplementary material for: Syntheses and coordination chemistry of thiosemicarbazone-based titanium complexes
Source: Royal Society of Chemistry journal article supplement (doi:10.1039/d4nj04061a), 2024-01-01
Supplement: d4nj04061a1.pdf [file d4nj04061a1.pdf]

## Supporting Information

### **Syntheses and Coordination Chemistry of Thiosemicarbazone-based Titanium Complexes**

Kevin Schwitalla, Marie Claußen, Marc Schmidtman and Rüdiger Beckhaus\*

Chemistry Department, Carl von Ossietzky University of Oldenburg, 26111 Oldenburg, Germany

E-mail: ruediger.beckhaus@uol.de

#### TABLE OF CONTENTS

|                                       |    |
|---------------------------------------|----|
| <b>NMR spectra of complexes</b> ..... | 2  |
| <b>Computational methods</b> .....    | 10 |
| <b>Crystallographic data</b> .....    | 12 |
| <b>IR Spectra</b> .....               | 14 |
| <b>EPR Spectra</b> .....              | 18 |
| <b>References</b> .....               | 19 |

## NMR Spectra of complexes

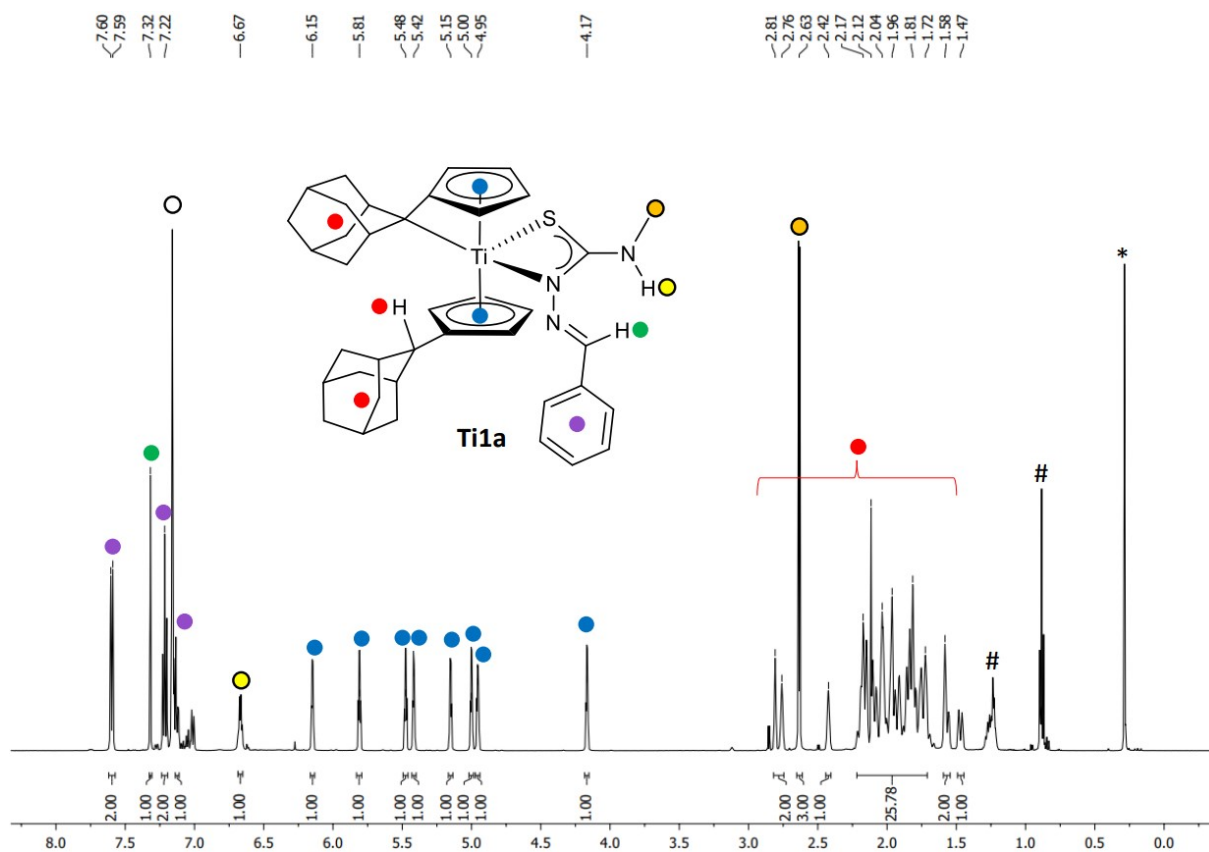

**Figure S1:** <sup>1</sup>H NMR spectrum (500 MHz, C<sub>6</sub>D<sub>6</sub>, 305 K) of **Ti1a**. Product signals given in colours (° = C<sub>6</sub>H<sub>5</sub>D, # = *n*-hexane, \* = grease).

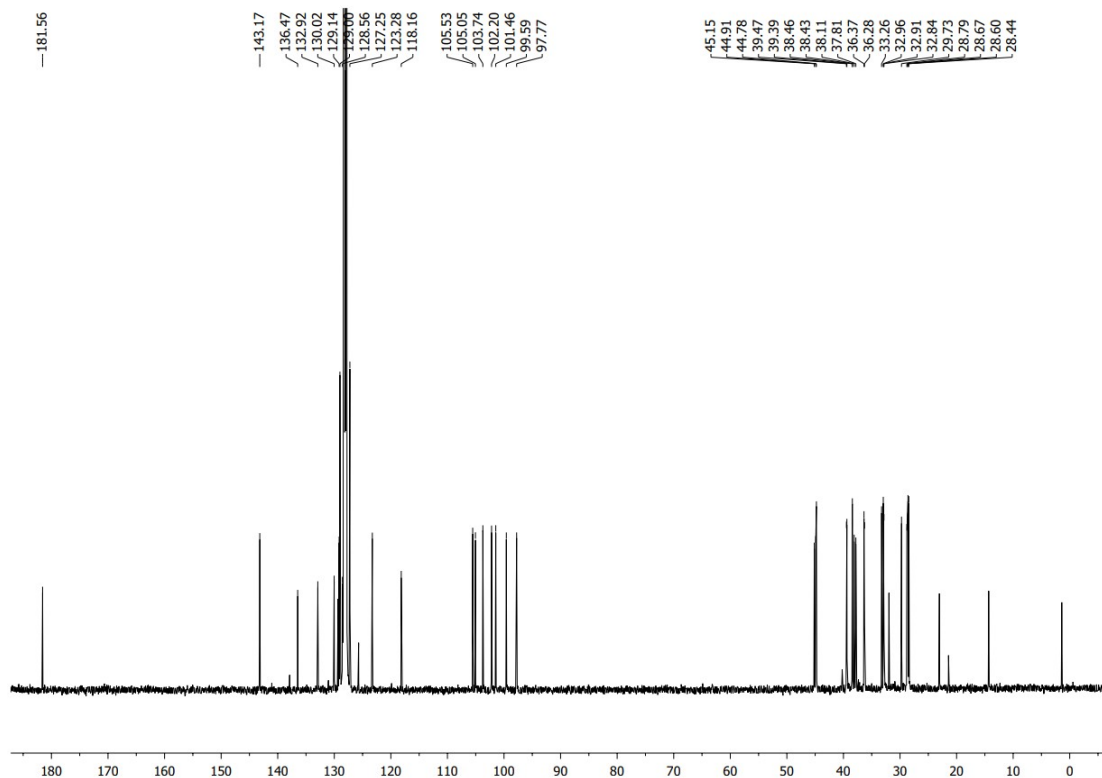

**Figure S2:** <sup>13</sup>C NMR spectrum (125 MHz, C<sub>6</sub>D<sub>6</sub>, 305 K) of **Ti1a**.

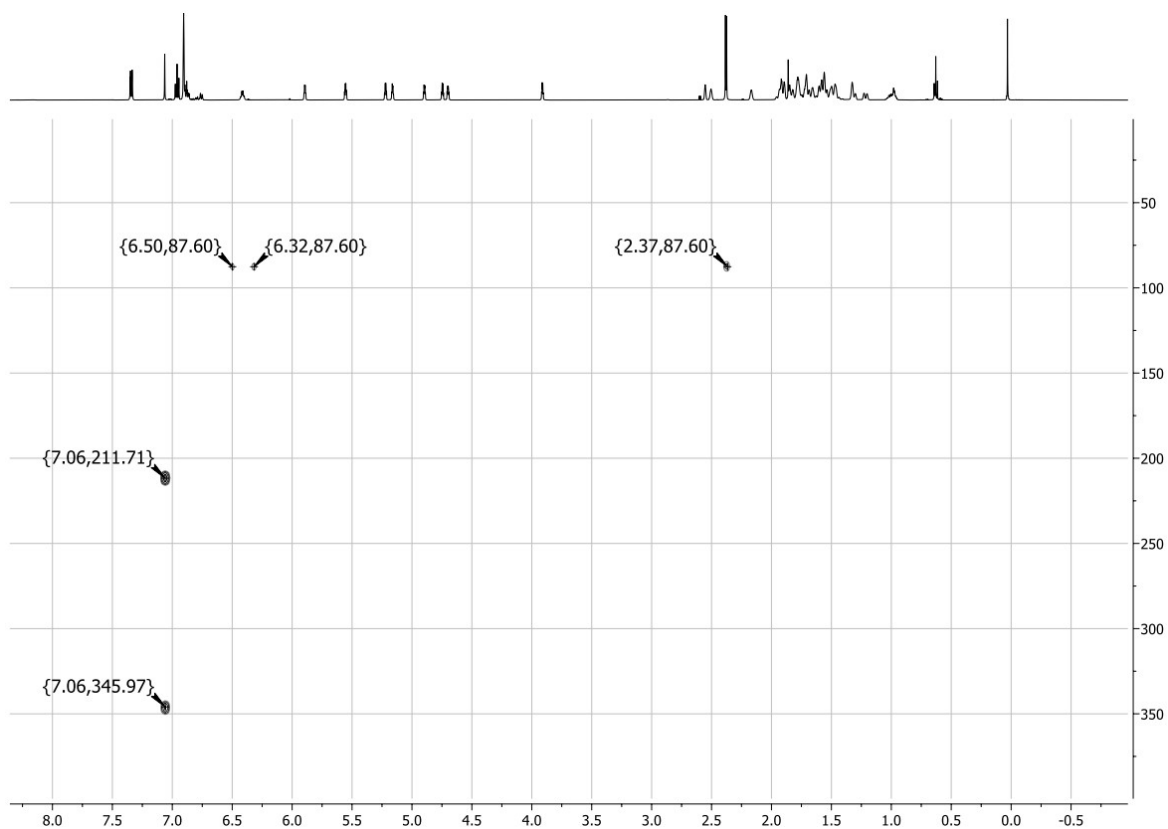

**Figure S3:**  $^1\text{H}$ - $^{15}\text{N}$ -HMBC NMR spectrum (51 MHz,  $\text{C}_6\text{D}_6$ , 305 K) of **Ti1a**.

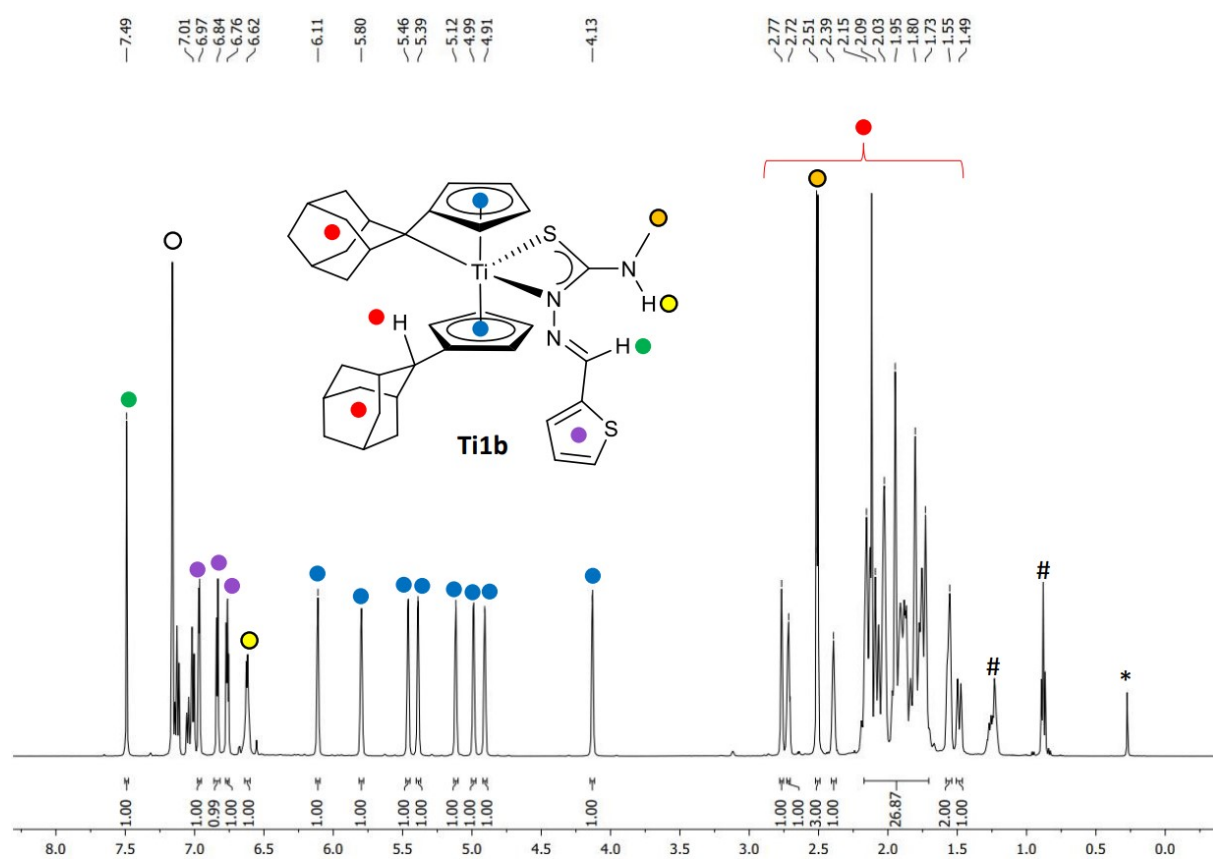

**Figure S4:**  $^1\text{H}$  NMR spectrum (500 MHz,  $\text{C}_6\text{D}_6$ , 305 K) of **Ti1b**. Product signals given in colours ( $^{\circ}$  =  $\text{C}_6\text{H}_5\text{D}$ , # =  $n$ -hexane, \* = grease).

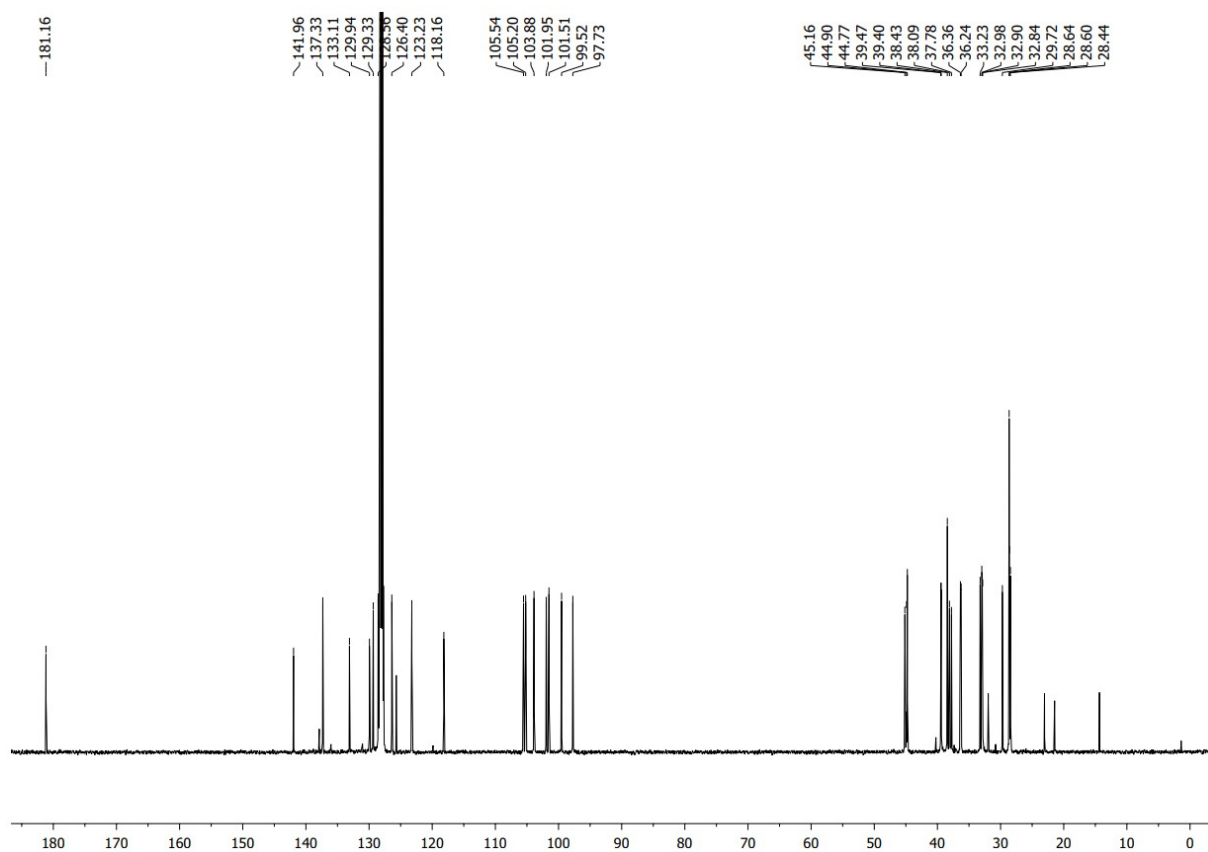

**Figure S5:**  $^{13}\text{C}$  NMR spectrum (125 MHz,  $\text{C}_6\text{D}_6$ , 305 K) of **Ti1b**.

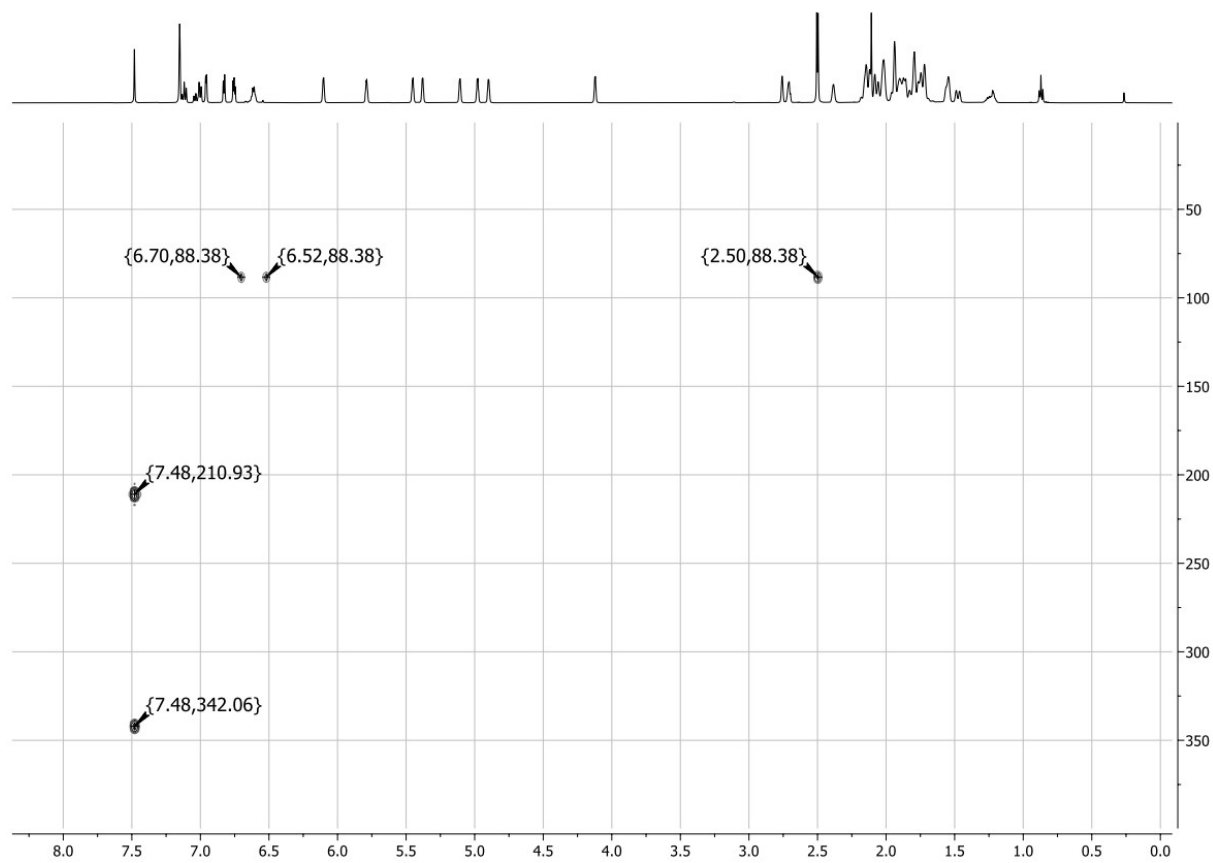

**Figure S6:**  $^1\text{H}$ - $^{15}\text{N}$ -HMBC NMR spectrum (51 MHz,  $\text{C}_6\text{D}_6$ , 305 K) of **Ti1b**.

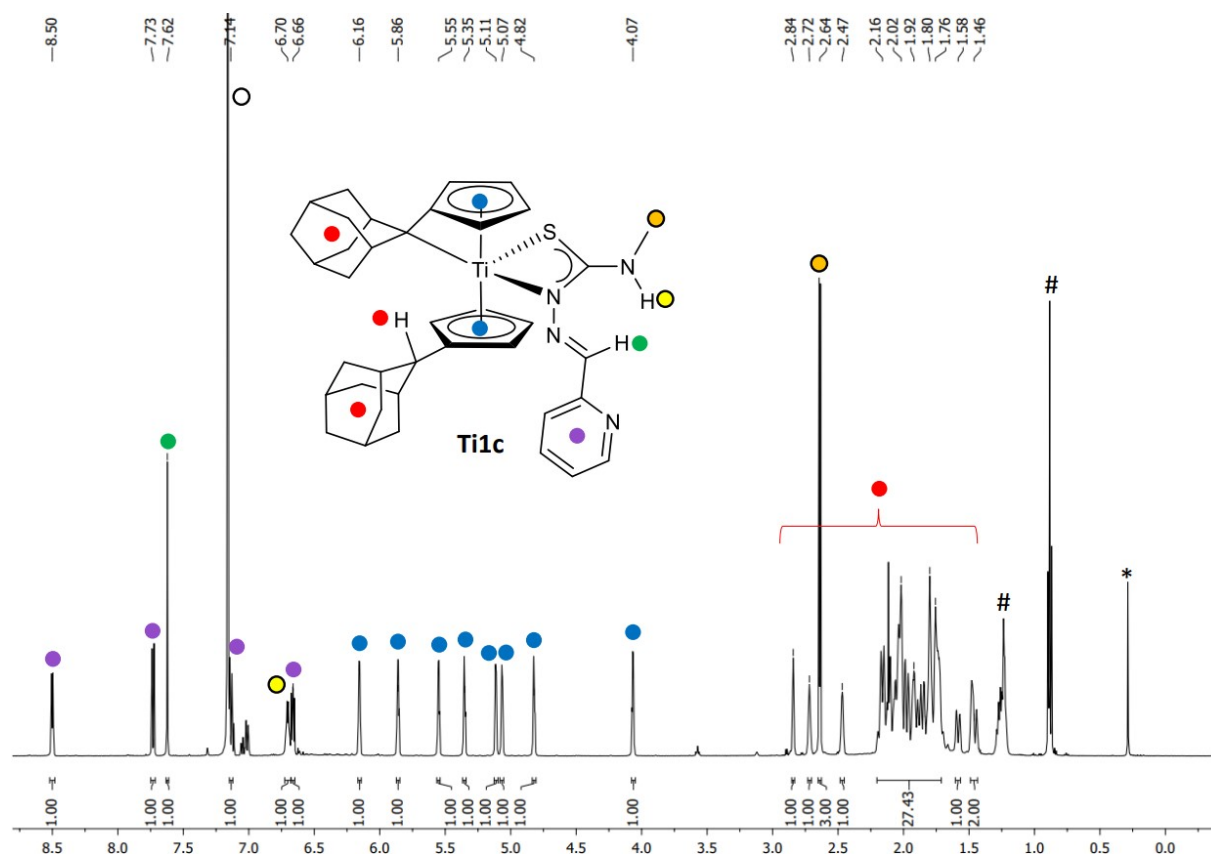

**Figure S7:**  $^1\text{H}$  NMR spectrum (500 MHz,  $\text{C}_6\text{D}_6$ , 305 K) of **Ti1c**. Product signals given in colours ( $^{\circ}$  =  $\text{C}_6\text{H}_5\text{D}$ , # = *n*-hexane, \* = grease).

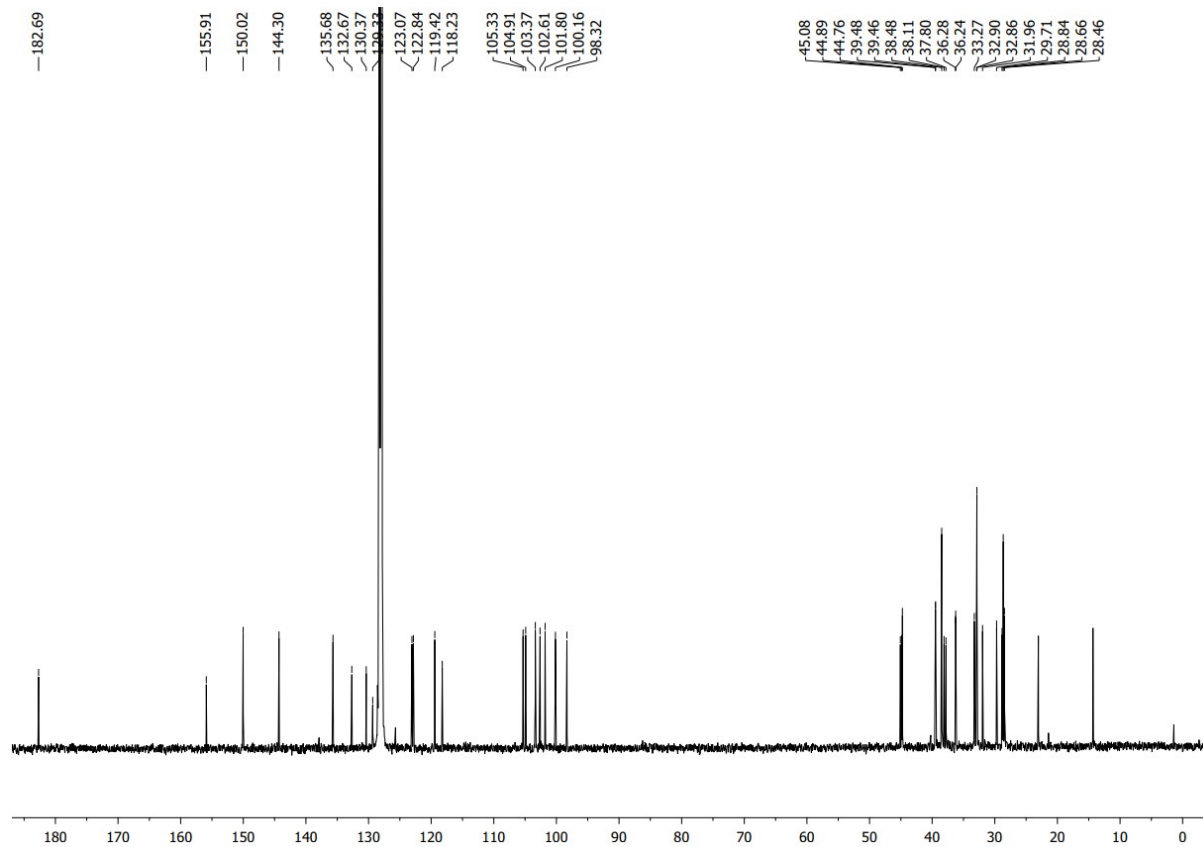

**Figure S8:**  $^{13}\text{C}$  NMR spectrum (125 MHz,  $\text{C}_6\text{D}_6$ , 305 K) of **Ti1c**.

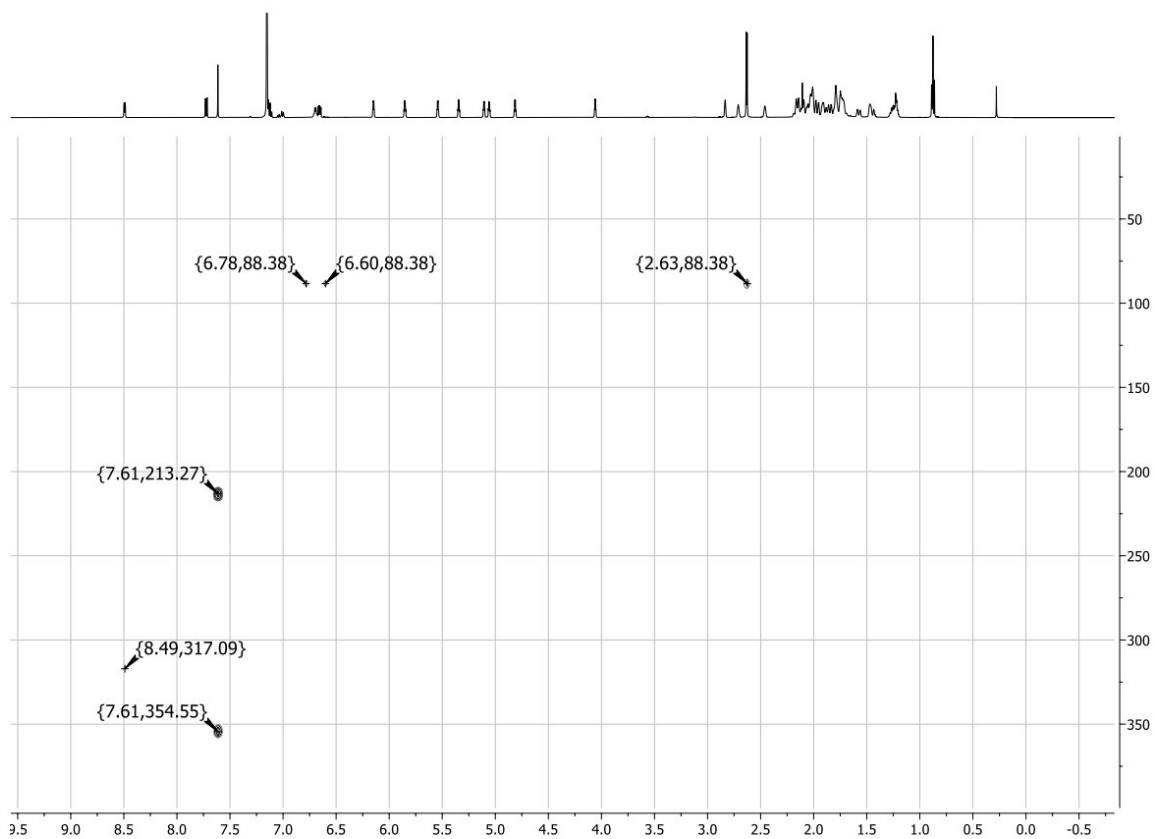

**Figure S9:**  $^1\text{H}$ - $^{15}\text{N}$ -HMBC NMR spectrum (51 MHz,  $\text{C}_6\text{D}_6$ , 305 K) of **Ti1c**.

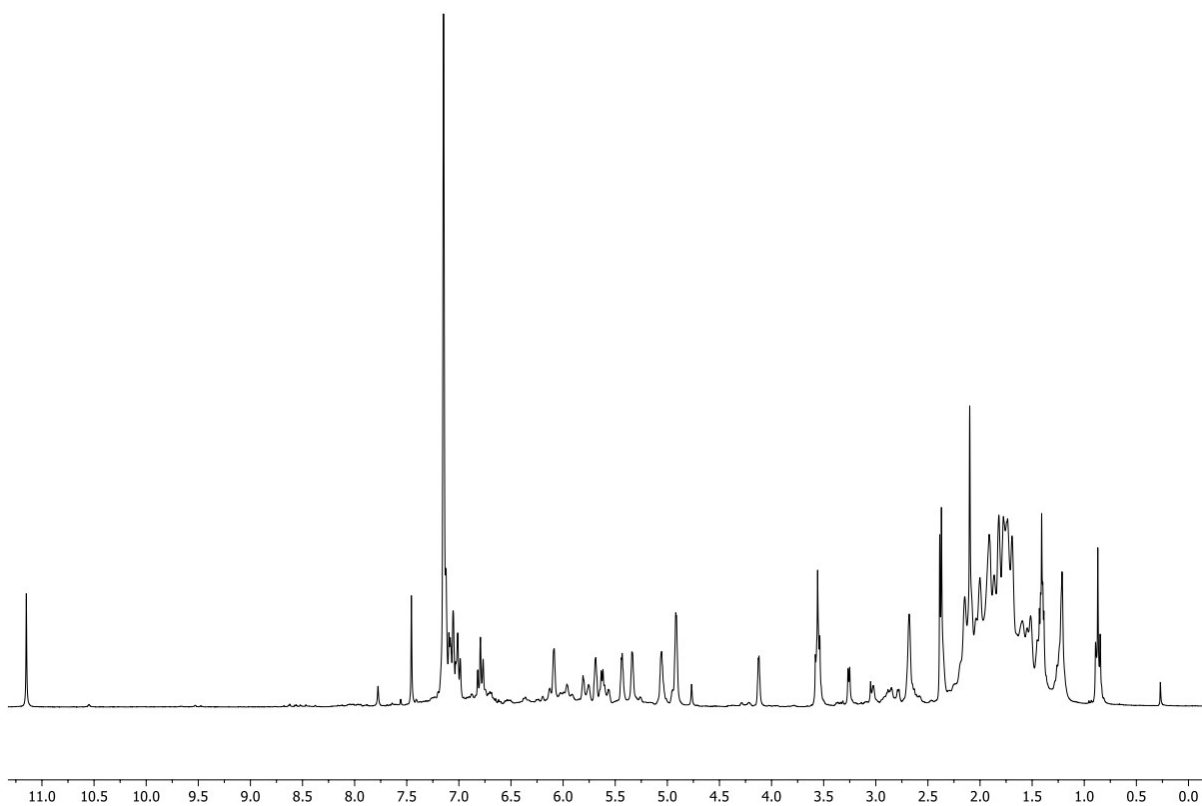

**Figure S10:**  $^1\text{H}$  NMR spectrum (300 MHz,  $\text{C}_6\text{D}_6$ , 305 K) of product mixture after the reaction of **Ti1** with TSCN **d**.

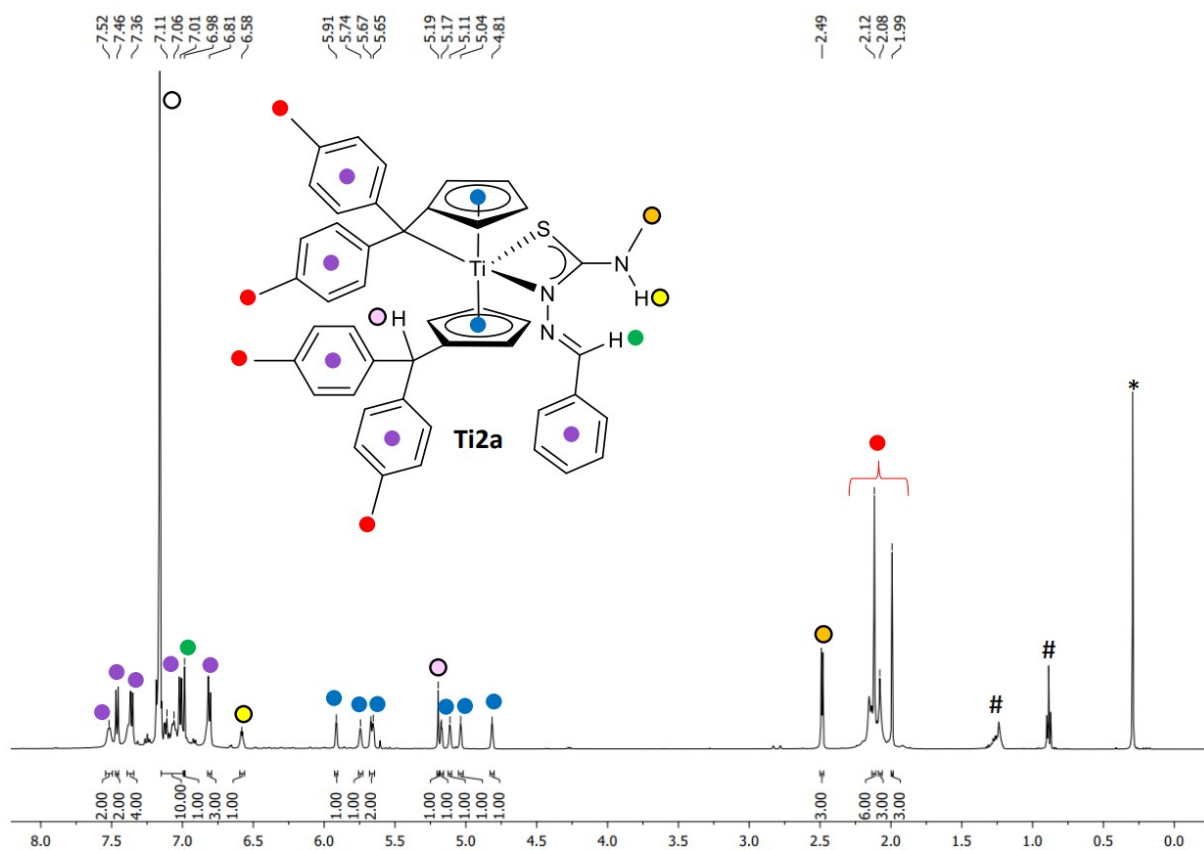

**Figure S11:**  $^1\text{H}$  NMR spectrum (500 MHz,  $\text{C}_6\text{D}_6$ , 305 K) of **Ti2a**. Product signals given in colours ( $^{\circ}$  =  $\text{C}_6\text{H}_5\text{D}$ , # =  $n$ -hexane, \* = grease).

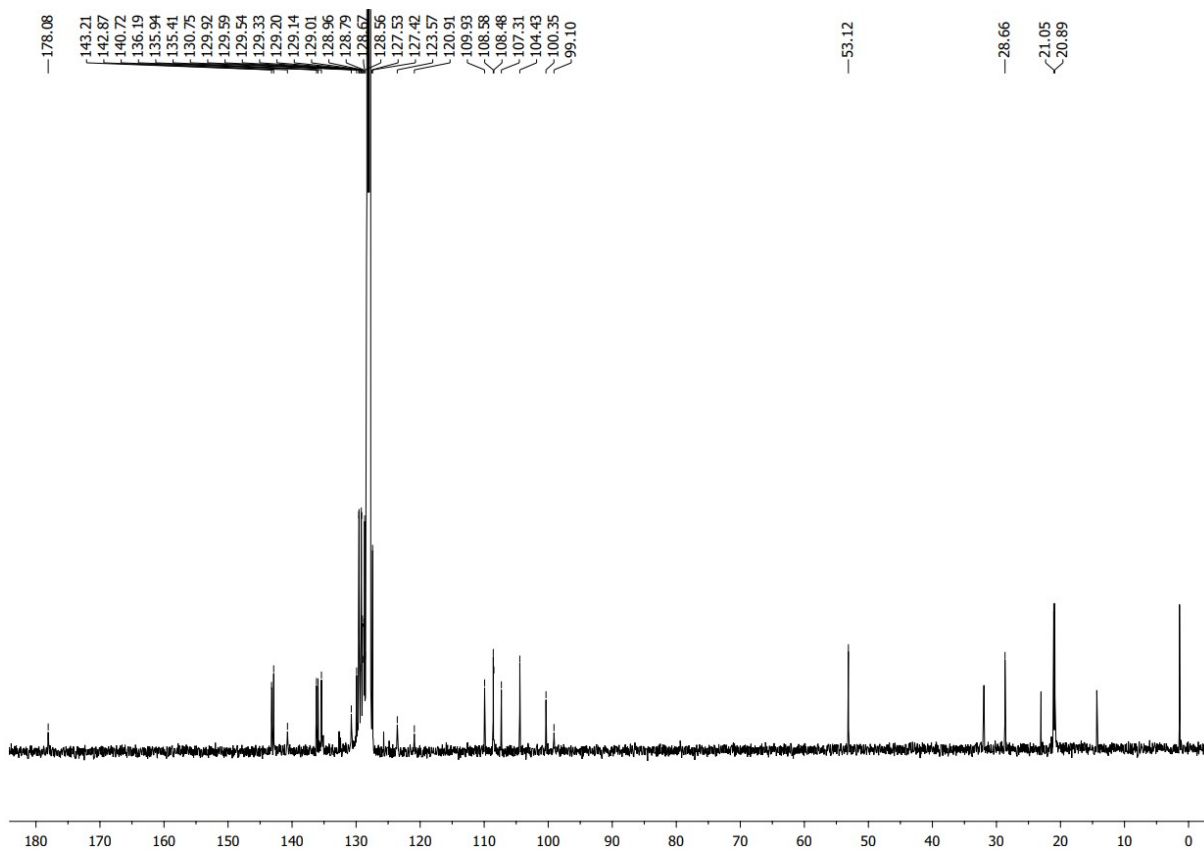

**Figure S12:**  $^{13}\text{C}$  NMR spectrum (125 MHz,  $\text{C}_6\text{D}_6$ , 305 K) of **Ti2a**.

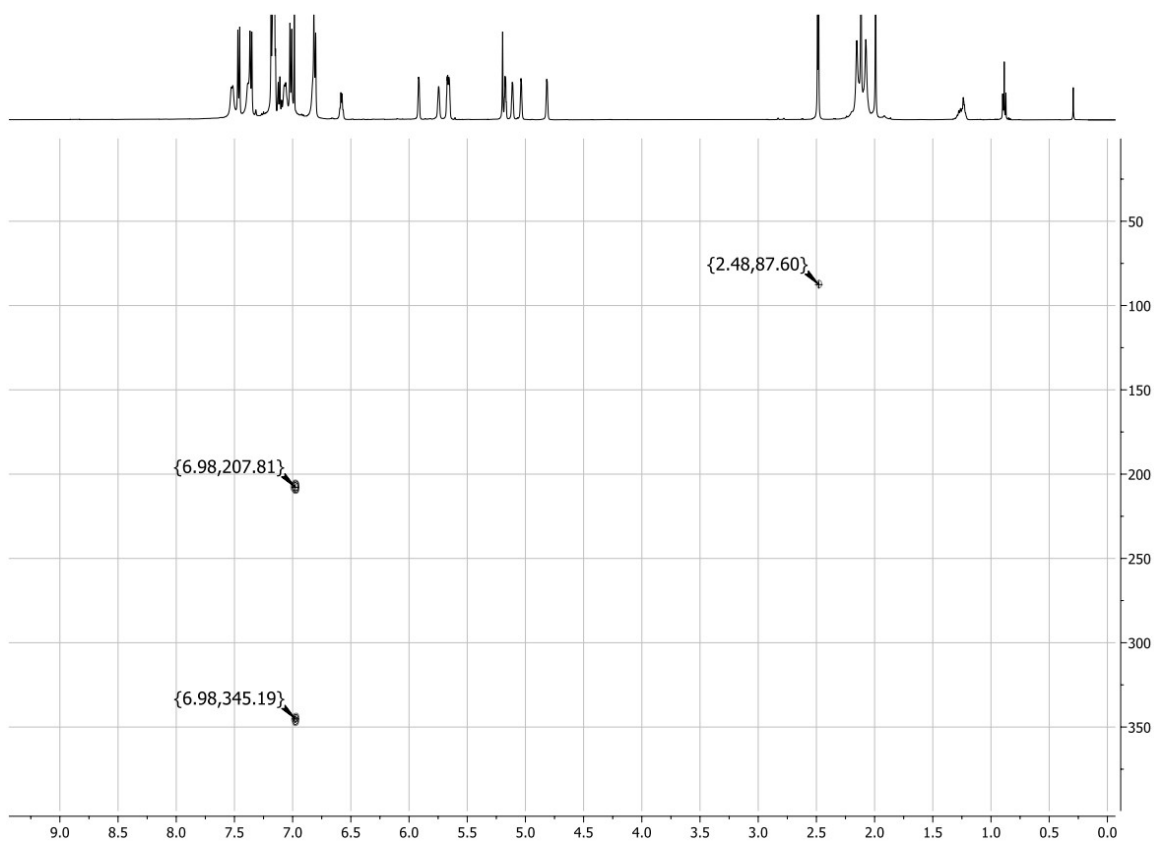

**Figure S13:**  $^1\text{H}$ - $^{15}\text{N}$ -HMBC NMR spectrum (51 MHz,  $\text{C}_6\text{D}_6$ , 305 K) of **Ti2a**.

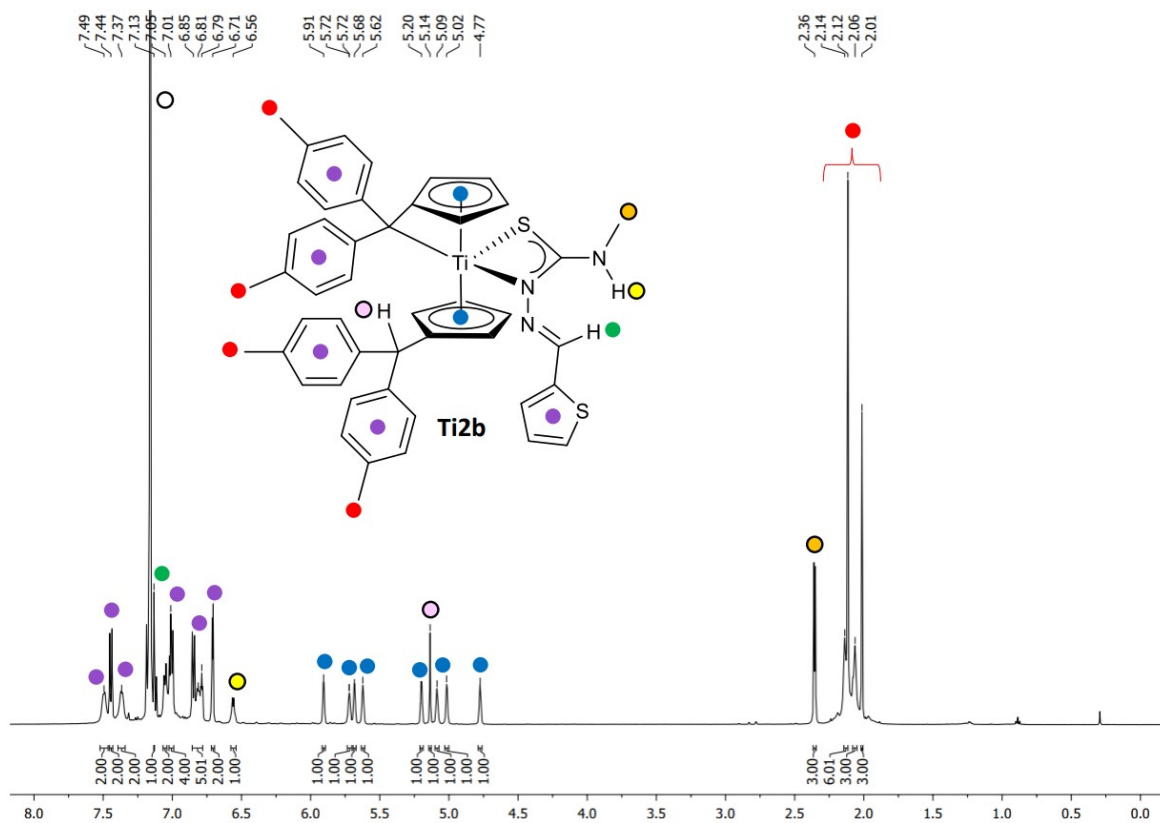

**Figure S14:**  $^1\text{H}$  NMR spectrum (500 MHz,  $\text{C}_6\text{D}_6$ , 305 K) of **Ti2b**. Product signals given in colours ( $^\circ = \text{C}_6\text{H}_5\text{D}$ ).



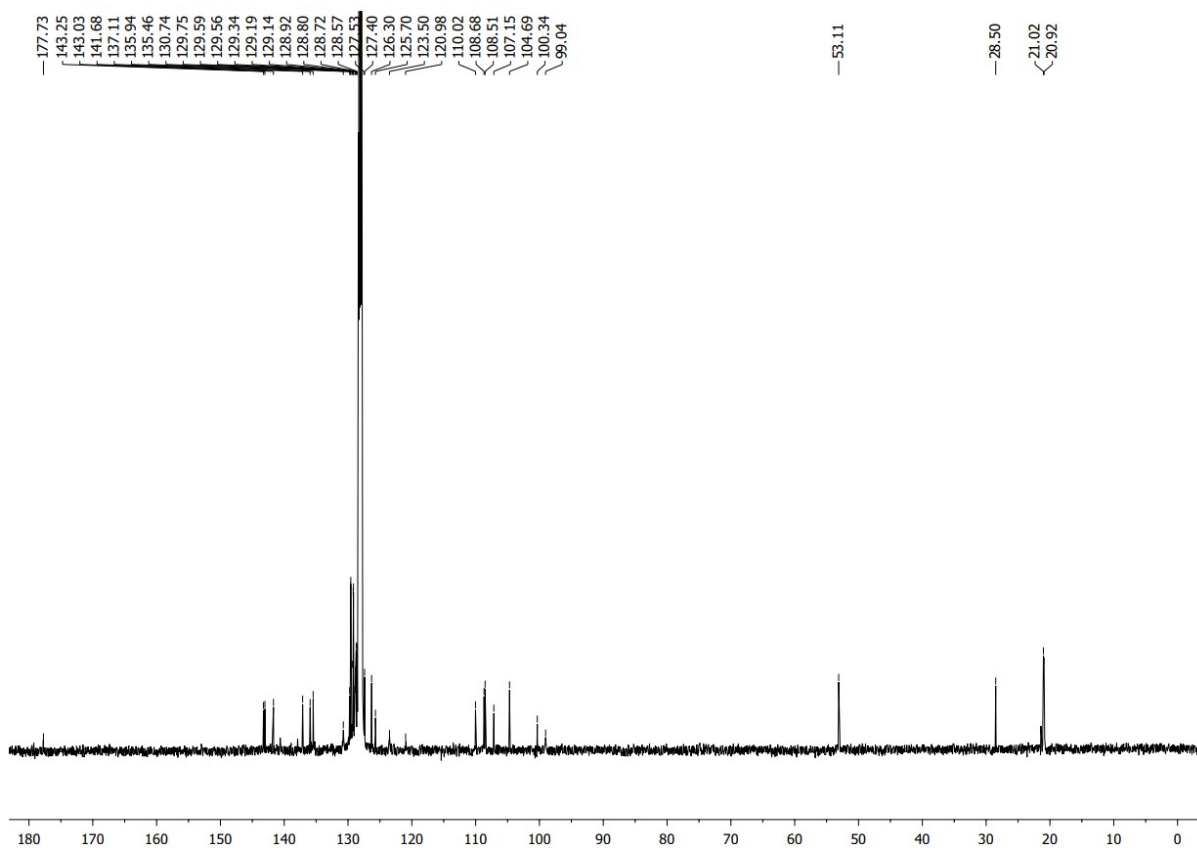

**Figure S15:**  $^{13}\text{C}$  NMR spectrum (125 MHz,  $\text{C}_6\text{D}_6$ , 305 K) of **Ti2b**.

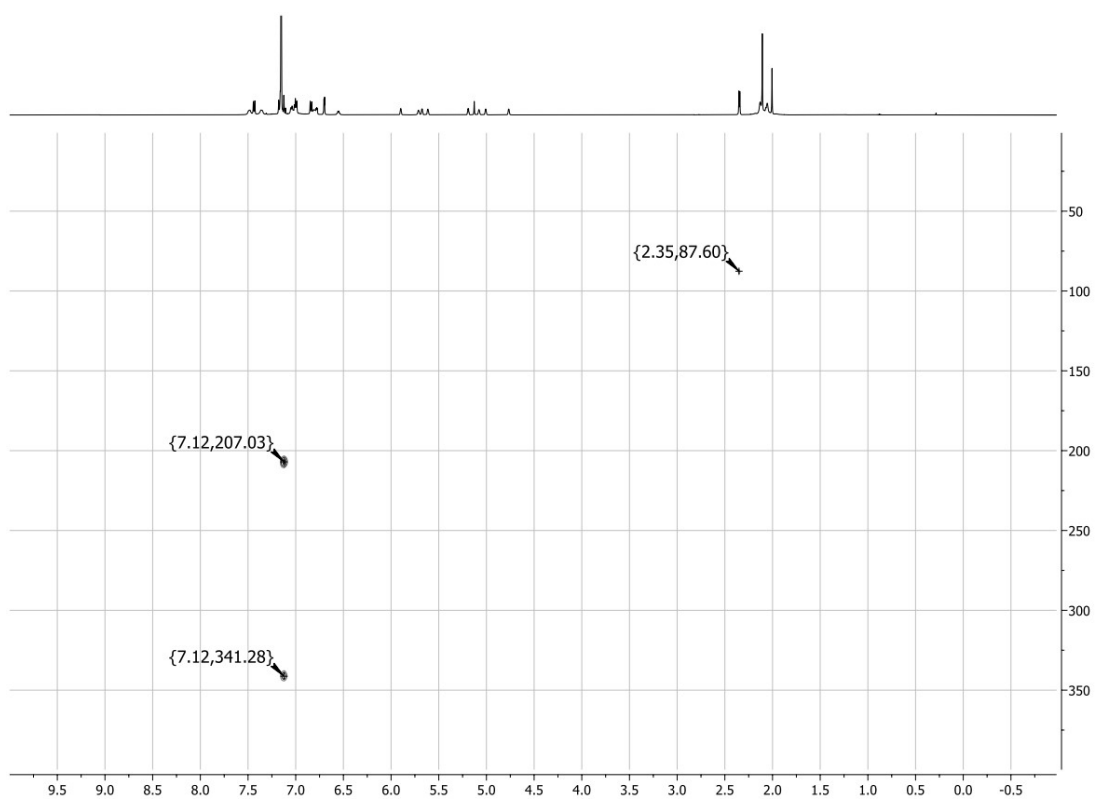

**Figure S16:**  $^1\text{H}$ - $^{15}\text{N}$ -HMBC NMR spectrum (51 MHz,  $\text{C}_6\text{D}_6$ , 305 K) of **Ti2b**.

## Computational methods

The DFT (density functional theory) calculations were performed with the B3LYP/Def2-TZVP level of theory.<sup>[1]</sup> The optimized ground state geometry of **Ti3c** was calculated in gas phase.

Cartesian coordinates (Å) of **Ti3c**:

|    |           |          |           |
|----|-----------|----------|-----------|
| Ti | 1.824692  | 3.439617 | 1.086387  |
| N  | 3.276898  | 4.189097 | 2.645833  |
| N  | 0.528687  | 4.185418 | 2.948117  |
| C  | 0.828001  | 5.392527 | 0.034905  |
| C  | 2.236556  | 1.422539 | 2.328711  |
| C  | 3.102956  | 1.412646 | 1.206314  |
| C  | 2.152658  | 5.722689 | 0.397554  |
| C  | 0.880758  | 4.383560 | -0.943802 |
| C  | 2.302358  | 1.309022 | 0.049925  |
| C  | 2.243807  | 4.102327 | -1.207180 |
| C  | 0.944483  | 1.262484 | 0.452291  |
| C  | 0.908459  | 1.318102 | 1.856826  |
| C  | 3.032721  | 4.922102 | -0.375287 |
| N  | -0.780398 | 4.185759 | 3.281096  |
| C  | 1.285936  | 4.641002 | 3.898334  |
| C  | 4.609209  | 4.197199 | 2.541084  |
| C  | 2.720864  | 4.661120 | 3.780724  |
| H  | 2.534921  | 1.480529 | 3.363219  |
| H  | 4.180623  | 1.446813 | 1.231375  |
| H  | 2.663001  | 1.252476 | -0.963471 |
| H  | 0.085824  | 1.204432 | -0.195431 |
| H  | 0.017430  | 1.311512 | 2.462108  |
| H  | 2.442731  | 6.466566 | 1.122122  |
| H  | 4.110396  | 4.956304 | -0.357022 |
| H  | 2.614655  | 3.396204 | -1.931217 |
| H  | 0.030114  | 3.905763 | -1.399423 |
| H  | -0.073139 | 5.804868 | 0.456773  |
| H  | 0.867764  | 4.987645 | 4.841678  |
| C  | 3.495625  | 5.144338 | 4.841312  |
| C  | 4.873178  | 5.147344 | 4.718033  |
| H  | 2.999201  | 5.492437 | 5.738053  |
| C  | 5.443627  | 4.666019 | 3.543069  |
| H  | 5.494753  | 5.514593 | 5.524313  |
| H  | 6.515319  | 4.646641 | 3.401581  |
| H  | 5.018987  | 3.810376 | 1.617712  |
| S  | -0.920136 | 4.581897 | 7.090213  |
| O  | 0.405678  | 5.154871 | 6.911605  |
| O  | -1.709170 | 4.593893 | 5.840327  |
| O  | -1.650285 | 4.947888 | 8.270430  |
| C  | -0.567984 | 2.759470 | 7.282528  |
| F  | 0.154770  | 2.505600 | 8.377476  |
| F  | 0.134459  | 2.309398 | 6.213890  |

|   |           |          |          |
|---|-----------|----------|----------|
| F | -1.698616 | 2.044718 | 7.348062 |
| H | -0.984502 | 4.435560 | 4.265324 |
| C | -1.872947 | 3.774539 | 2.541484 |
| S | -1.879403 | 3.366804 | 0.924999 |
| N | -2.978902 | 3.766484 | 3.308069 |
| H | -2.884838 | 3.989886 | 4.294172 |
| C | -4.301127 | 3.444212 | 2.810480 |
| H | -5.002763 | 3.555721 | 3.635085 |
| H | -4.586063 | 4.113399 | 1.996917 |
| H | -4.342927 | 2.420606 | 2.433808 |

## Crystallographic data

Single crystal X-ray data for **Ti1a** were measured on a Bruker AXS Apex II diffractometer (graphite monochromator, Mo-K $\alpha$  radiation,  $\lambda = 0.71073 \text{ \AA}$ , Kappa 4-circle goniometer, Apex II CCD detector). Single crystal data for **Ti1c**, **Ti1d**, **Ti2b** and **Ti3d** were measured on a Bruker AXS D8 Venture diffractometer (multilayer optics, Mo-K $\alpha$  and Cu-K $\alpha$  radiation with  $\lambda = 0.71073 \text{ \AA}$  and  $1.54178 \text{ \AA}$  respectively, Kappa 4-circle goniometer, Photon III C14 CPAD detector). All crystals were measured at a temperature of 100 K. Absorption corrections using equivalent reflections were performed with the program SADABS.<sup>[2]</sup> For **Ti1a** a numerical absorption correction was performed using the same program. All structures were solved with the program SHELXS<sup>[3]</sup> and refined with SHELXL<sup>[4]</sup> using the OLEX2<sup>[5]</sup> GUI.

All non H atoms were refined using anisotropic atomic displacement parameters (ADPs). H atoms bonded to C were located in the difference Fourier maps and placed on idealized geometric positions with idealized atomic displacement parameters using the riding model. H atoms bonded to N were refined freely. The geometry of the disordered solvent tetrahydrofuran in **Ti3d** was restrained to be the same (SAME instruction in SHELXL), and the isotropic ADPs were constrained to be the equal (EADP).

The crystallographic data can be obtained free of charge from <https://www.ccdc.cam.ac.uk/structures/> quoting the CCDC numbers 2377764-2377768.

|                                                  | Ti1a                                               | Ti1c                                               | Ti1d                                                | Ti2b                                                             | Ti3d                                                                                                            |
|--------------------------------------------------|----------------------------------------------------|----------------------------------------------------|-----------------------------------------------------|------------------------------------------------------------------|-----------------------------------------------------------------------------------------------------------------|
| CCDC                                             | 2377765                                            | 2377767                                            | 2377764                                             | 2377768                                                          | 2377766                                                                                                         |
| Lab-ID                                           | KESC146                                            | MACL22                                             | MACL25                                              | MACL28                                                           | KESC269                                                                                                         |
| empirical formula                                | C <sub>39</sub> H <sub>47</sub> N <sub>3</sub> STi | C <sub>44</sub> H <sub>52</sub> N <sub>4</sub> STi | C <sub>39</sub> H <sub>47</sub> N <sub>3</sub> OSTi | C <sub>47</sub> H <sub>45</sub> N <sub>3</sub> S <sub>2</sub> Ti | C <sub>42</sub> H <sub>54</sub> F <sub>6</sub> N <sub>6</sub> O <sub>11</sub><br>S <sub>4</sub> Ti <sub>2</sub> |
| Fw                                               | 637.75                                             | 716.85                                             | 653.75                                              | 763.88                                                           | 1156.95                                                                                                         |
| Colour                                           | red                                                | orange                                             | orange                                              | red                                                              | yellow green<br>orange                                                                                          |
| Habit                                            | block                                              | rod                                                | block                                               | block                                                            | block                                                                                                           |
| cryst. dimens. mm                                | 0.40 x 0.35 x<br>0.25                              | 0.25 x 0.07 x<br>0.02                              | 0.06 x 0.06 x<br>0.03                               | 0.12 x 0.09 x<br>0.05                                            | 0.12 x 0.10 x<br>0.04                                                                                           |
| cryst. system                                    | triclinic                                          | orthorhombic                                       | monoclinic                                          | monoclinic                                                       | monoclinic                                                                                                      |
| space group                                      | P-1                                                | Pbca                                               | P2 <sub>1/n</sub>                                   | P2 <sub>1/n</sub>                                                | C2/c                                                                                                            |
| a, Å                                             | 11.6805(6)                                         | 23.3583(14)                                        | 12.0547(3)                                          | 14.4377(5)                                                       | 13.7863(7)                                                                                                      |
| b, Å                                             | 12.0032(6)                                         | 10.5011(5)                                         | 11.8933(3)                                          | 12.5870(5)                                                       | 22.5048(13)                                                                                                     |
| c, Å                                             | 12.9169(7)                                         | 30.2781(18)                                        | 22.4765(5)                                          | 21.9625(8)                                                       | 17.5439(10)                                                                                                     |
| α, deg                                           | 92.218(3)                                          | 90                                                 | 90                                                  | 90                                                               | 90                                                                                                              |
| β, deg                                           | 107.971(3)                                         | 90                                                 | 101.8642(12)                                        | 97.4150(15)                                                      | 105.069(2)                                                                                                      |
| γ, deg                                           | 109.627(2)                                         | 90                                                 | 90                                                  | 90                                                               | 90                                                                                                              |
| V, Å <sup>3</sup>                                | 1601.95(15)                                        | 7426.8(7)                                          | 3153.62(13)                                         | 3957.8(3)                                                        | 5256.0(5)                                                                                                       |
| Z                                                | 2                                                  | 8                                                  | 4                                                   | 4                                                                | 4                                                                                                               |
| D <sub>calc.</sub> g cm <sup>-3</sup>            | 1.322                                              | 1.282                                              | 1.377                                               | 1.282                                                            | 1.462                                                                                                           |
| μ, mm <sup>-1</sup>                              | 0.366                                              | 0.324                                              | 3.200                                               | 0.359                                                            | 0.544                                                                                                           |
| T, K                                             | 100(2)                                             | 100(2)                                             | 100(2)                                              | 100(2)                                                           | 100(2)                                                                                                          |
| λ, Å                                             | 0.71073                                            | 0.71073                                            | 1.54178                                             | 0.71073                                                          | 0.71073                                                                                                         |
| θ range, deg                                     | 1.679 – 40.248                                     | 1.345 – 27.103                                     | 3.871 – 74.469                                      | 1.598 – 30.033                                                   | 1.777 – 30.033                                                                                                  |
| reflections collected                            | 100842                                             | 134443                                             | 54536                                               | 235418                                                           | 95632                                                                                                           |
| Indep. Reflecons<br>R(int)                       | 20177<br>0.0243                                    | 8197<br>0.0786                                     | 6406<br>0.0440                                      | 11566<br>0.0418                                                  | 7702<br>0.0504                                                                                                  |
| Observed reflections (I > 2(I))                  | 17407                                              | 7084                                               | 5846                                                | 10485                                                            | 6819                                                                                                            |
| Absorption correction                            | numerical                                          | semi-empirical                                     | semi-empirical                                      | semi-empirical                                                   | semi-empirical                                                                                                  |
| max, min transm.                                 | 0.9319, 0.8918                                     | 1.0000,<br>0.9099                                  | 1.0000,<br>0.9074                                   | 1.0000,<br>0.9392                                                | 1.0000,<br>0.9135                                                                                               |
| final R indices<br>[I > 2σ(I)]                   | R1 = 0.0283,<br>wR2 = 0.0773                       | R1 = 0.0449,<br>wR2 = 0.0904                       | R1 = 0.0315,<br>wR2 = 0.0818                        | R1 = 0.0350,<br>wR2 = 0.0909                                     | R1 = 0.0556,<br>wR2 = 0.1387                                                                                    |
| R indices (all data)                             | R1 = 0.0357,<br>wR2 = 0.0812                       | R1 = 0.0553,<br>wR2 = 0.0954                       | R1 = 0.0355,<br>wR2 = 0.0847                        | R1 = 0.0394,<br>wR2 = 0.0939                                     | R1 = 0.0634,<br>wR2 = 0.1434                                                                                    |
| GOF on F <sup>2</sup>                            | 1.045                                              | 1.085                                              | 1.037                                               | 1.068                                                            | 1.113                                                                                                           |
| largest diff peak /<br>hole (e.Å <sup>-3</sup> ) | 0.604 / -0.352                                     | 0.331 / -0.407                                     | 0.515 / -0.260                                      | 0.435 / -0.317                                                   | 1.629 / -0.638                                                                                                  |

## IR spectra

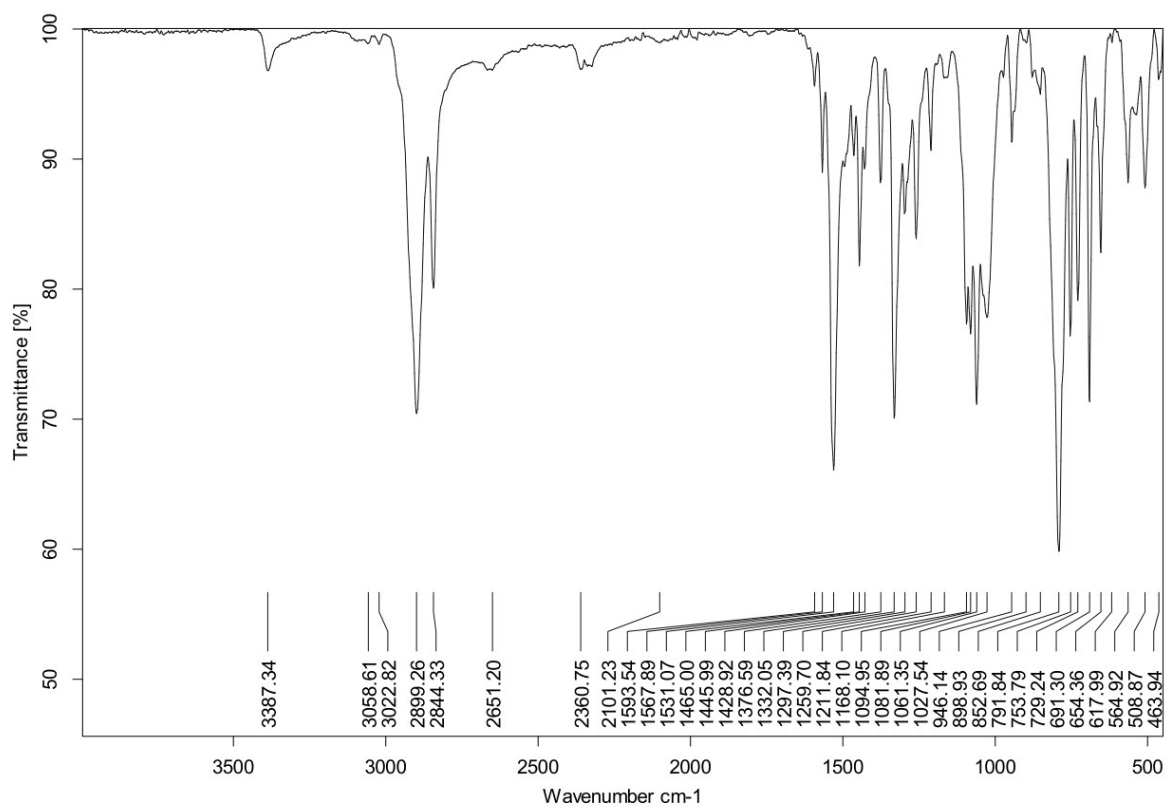

Figure S17: IR Spectrum of Ti1a.

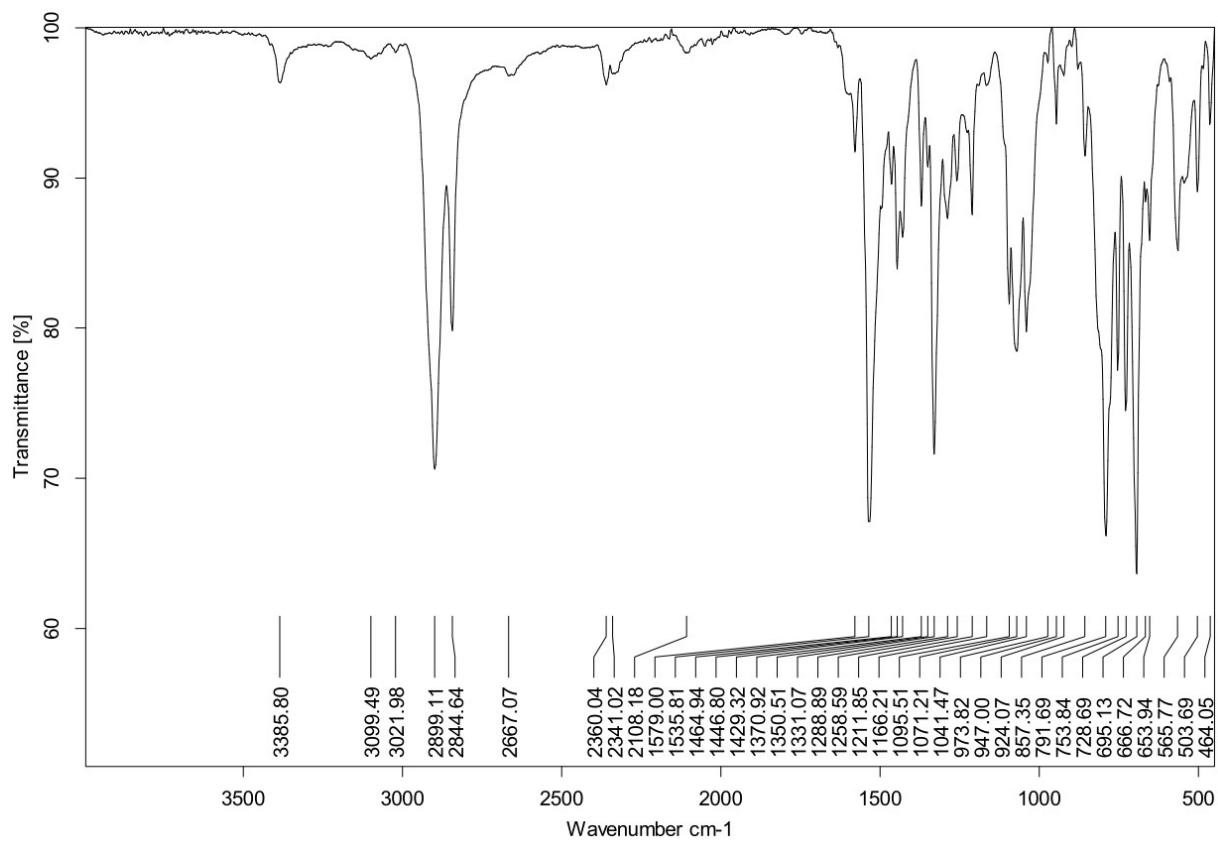

Figure S18: IR Spectrum of Ti1b.

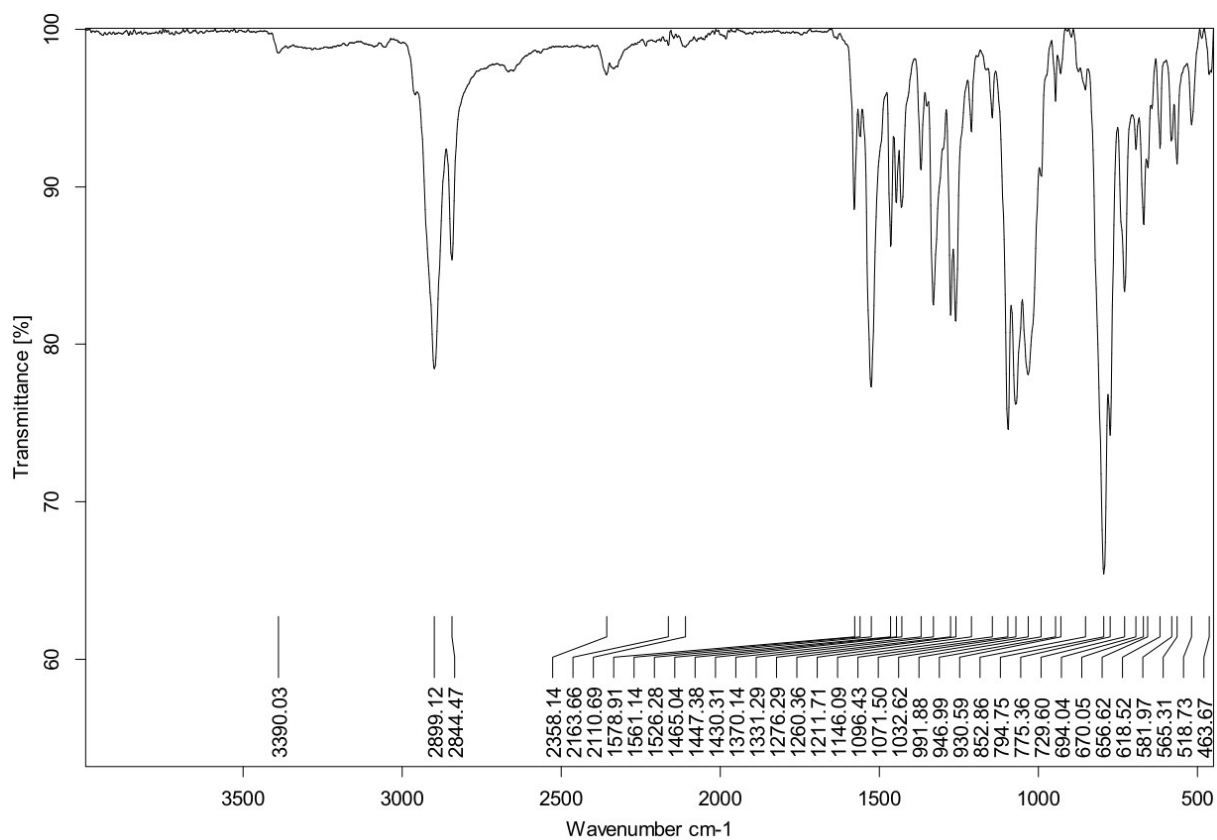

Figure S19: IR Spectrum of Ti1c.

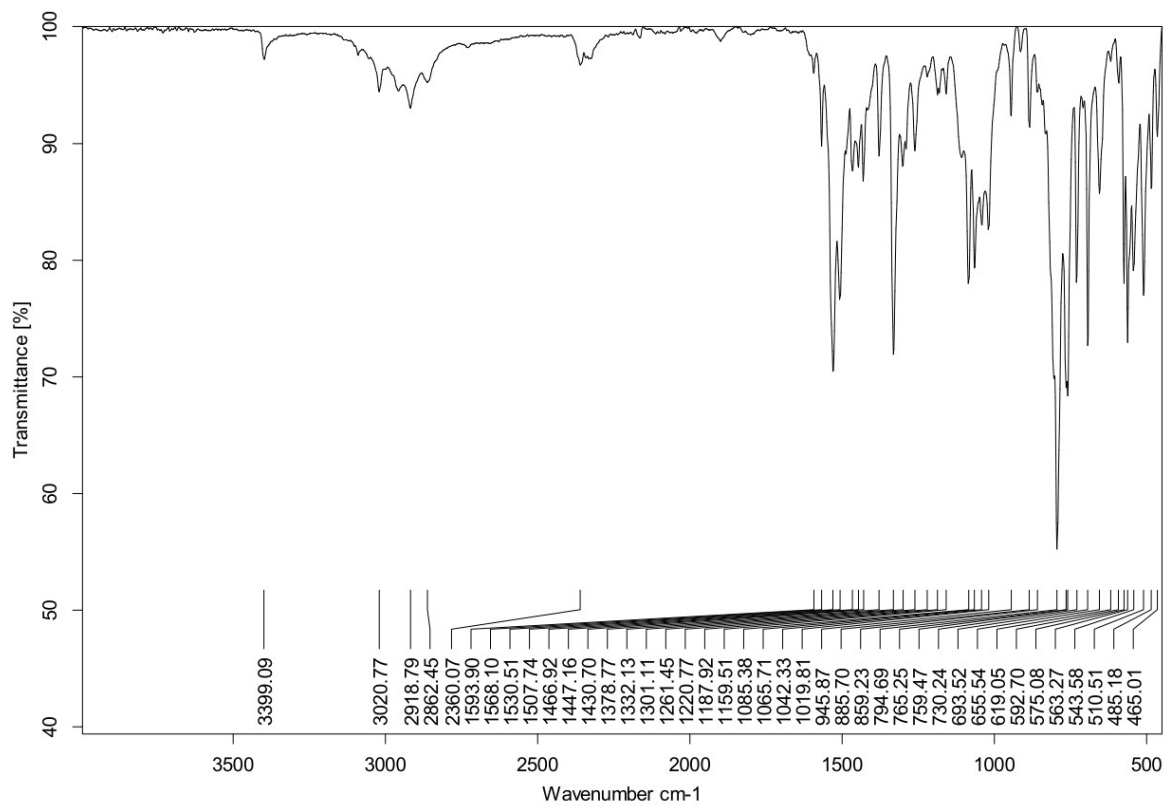

Figure S20: IR Spectrum of Ti2a.

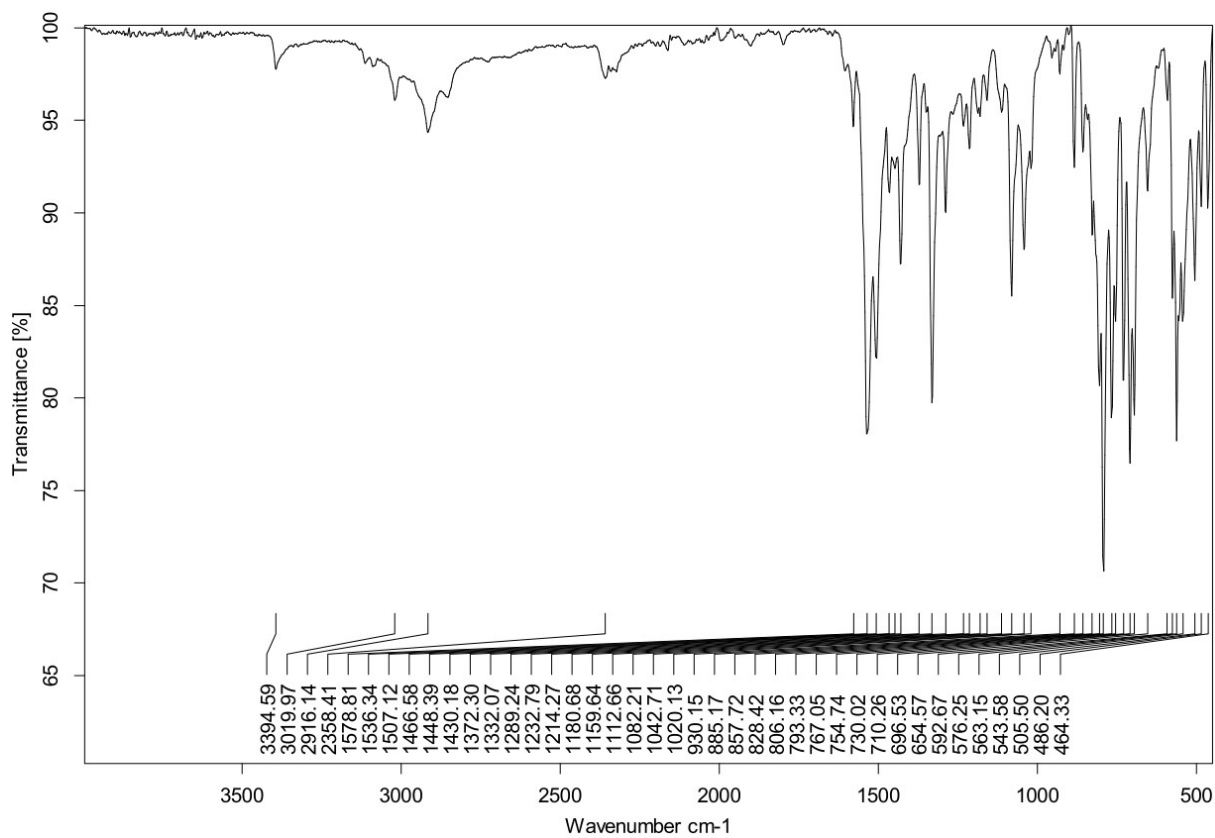

Figure S21: IR Spectrum of Ti2b.

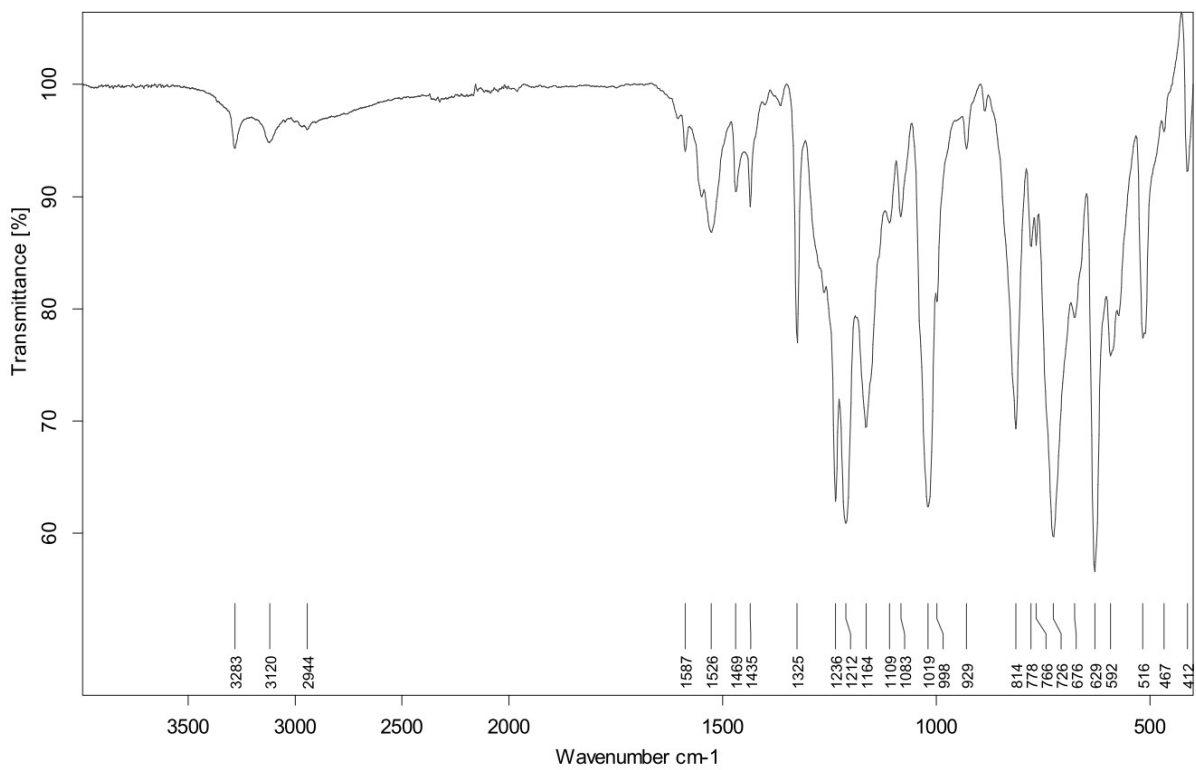

Figure S22: IR Spectrum of Ti3c.



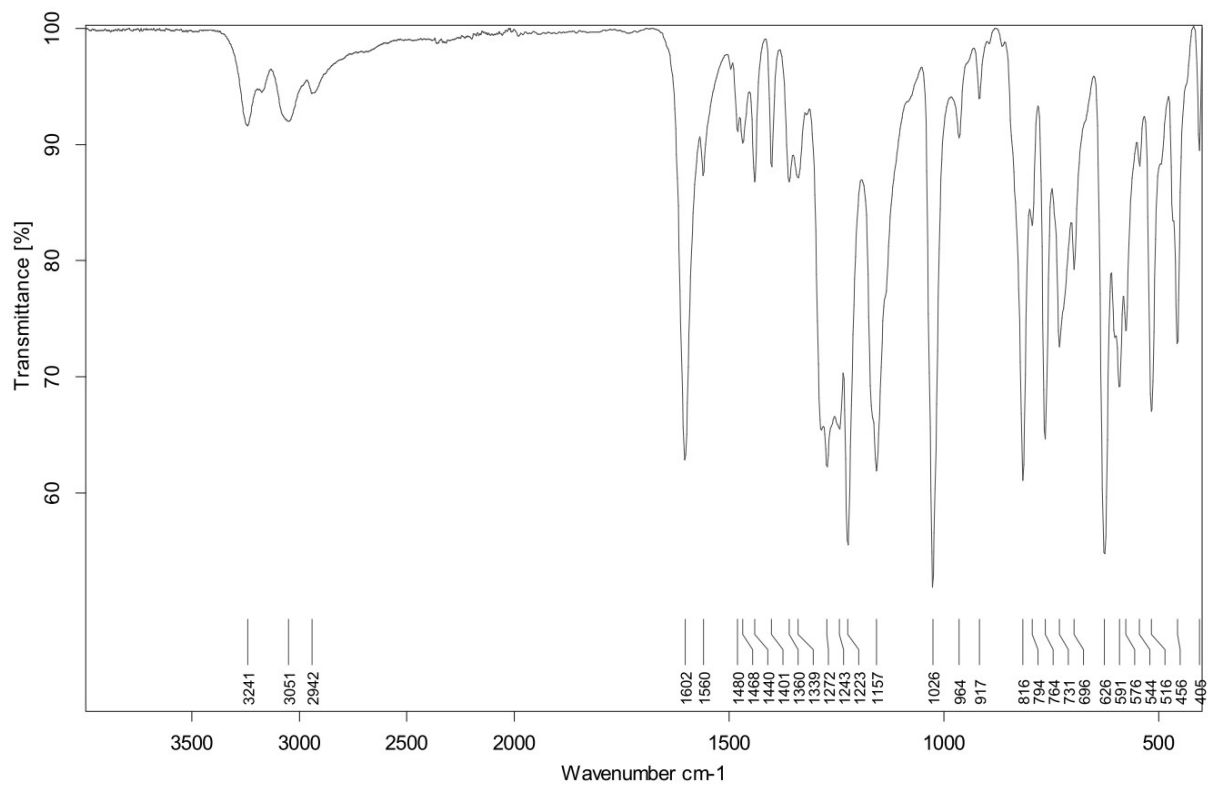

**Figure S23:** IR Spectrum of **Ti3d**.

## EPR Spectra

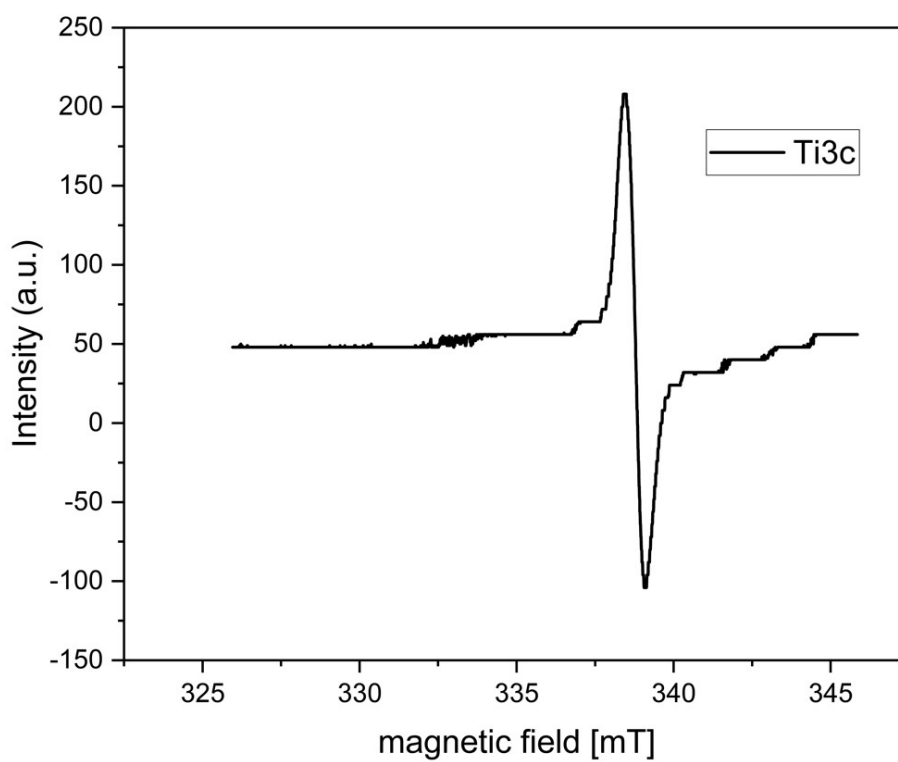

**Figure S24:** EPR spectrum of complex **Ti3c** in toluene at room temperature ( $g = 1.980$ ).

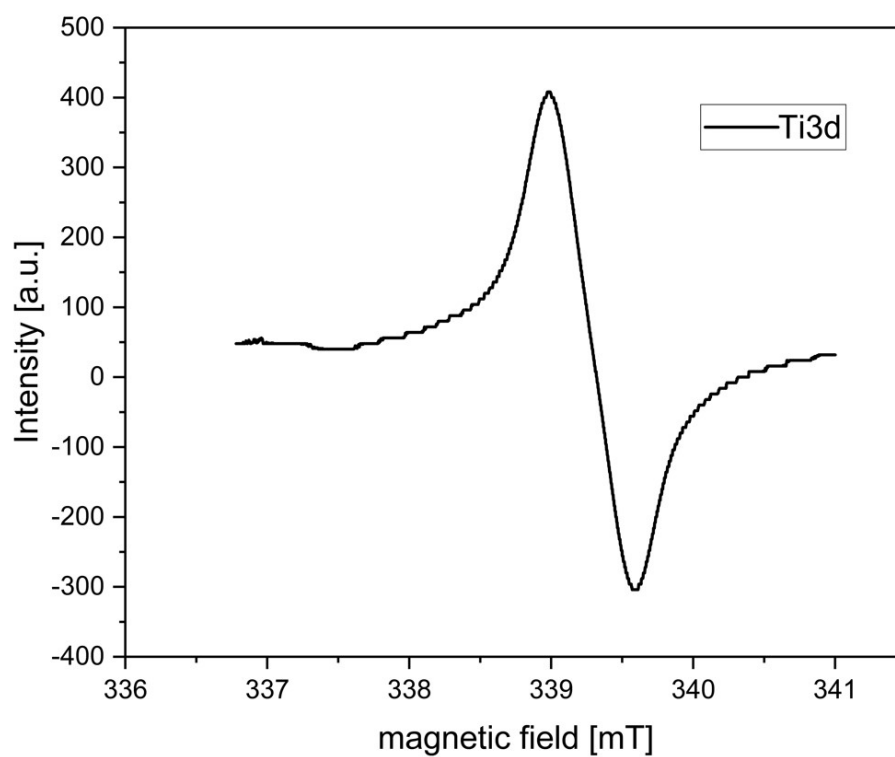

**Figure S25:** EPR spectrum of complex **Ti3d** in THF at room temperature ( $g = 1.977$ ).

## References

- [1] Weigend, F.; Ahlrichs, R., *Phys. Chem. Chem. Phys.* **2005**, *7*, 3297-3305.
- [2] L. Krause, R. Herbst-Irmer, G. M. Sheldrick, D. Stalke, *J. Appl. Crystallogr.* **2015**, *48*, 3-10.
- [3] G. M. Sheldrick, *Acta Crystallogr. Sec. A* **2008**, *64*, 112-122.
- [4] G. M. Sheldrick, *Acta Crystallogr. Sec. C* **2015**, *71*, 3-8.
- [5] O. V. Dolomanov, L. J. Bourhis, R. J. Gildea, J. A. K. Howard, H. Puschmann, *J. Appl. Crystallogr.* **2009**, *42*, 339-341.
